# Supplementary material for: A whole mitochondria analysis of the Tyrolean Iceman’s leather provides insights into the animal sources of Copper Age clothing
Source: PubMed Central journal article supplement (PMC4989873; doi:10.1038/srep31279), 2016-08-18
Supplement: srep31279-s1.pdf [file srep31279-s1.pdf]

Supplementary document: A whole mitochondria analysis of the Tyrolean  
Iceman's leather provides insights into the animal sources of copper age  
clothing

## Author list and affiliations

\*Niall J. O'Sullivan<sup>1, 3</sup>

Matthew D. Teasdale<sup>2</sup>

Valeria Mattiangeli<sup>2</sup>

Frank Maixner<sup>1</sup>

Ron Pinhasi<sup>3</sup>

Daniel G. Bradley<sup>2</sup>

Albert Zink<sup>1</sup>

<sup>1</sup>Institute for Mummies and the Iceman, EURAC research, 39100 Bolzano, Italy

<sup>2</sup>Smurfit Institute of Genetics, University of Dublin, Trinity College, Dublin 2, Ireland

<sup>3</sup>School of Archaeology, University College Dublin, Belfield, Dublin 4, Ireland

| Species Phylogeny (reference accession code)                                 | Accession codes of Mitogenomes and associated haplogroup                                                                                                                                                                                                                                                                                                                                                                                                                                                                                       | Outgroups (accession codes) and species                                                   |
|------------------------------------------------------------------------------|------------------------------------------------------------------------------------------------------------------------------------------------------------------------------------------------------------------------------------------------------------------------------------------------------------------------------------------------------------------------------------------------------------------------------------------------------------------------------------------------------------------------------------------------|-------------------------------------------------------------------------------------------|
| <b>Sheep</b><br><b>(<i>Ovis aries</i>)</b><br><b>(AF010406)</b>              | KF302447_B, KF302448_B1, AF010406_B1a1b_reference, EF490451_B1a_7G65F4, EF490454_B1a2_Oe173, EF490455_B1a_1LL2, EF490456_B1a_OLL15, HM236174_A1b_kk1, HM236175_A1b, HM236176_B1a4, HM236178_C_kk2, HM236179_C_mk4, HM236181_D, HM236182_E, HM236183_E, HM236185_B1a3_mouflon, KF302440_A1, KF302445_A1, KF302449_B1a1a, KF302450_B1a1a, KF302452_B1a2a, KF302453_B1a2a, KF302455_B1a2a, KF302457_B1a2a1a, KF302458_B1a2a1a, KF302459_B1a2a1a, KF302460_B1a2b, KF302461_B1a2b, KF302462_B1a2b, KF977845_B1a2_Djallonke, KF977846_B1a1b_Sahelian | HM236187_ <i>Ovis vignei</i> , HM236188_ <i>Ovis ammon</i> , HM236189_ <i>Ovis vignei</i> |
| <b>Goat</b><br><b>(<i>Capra aegagrus hircus</i>)</b><br><b>(NC_005044.2)</b> | GU068049_A3, GU295658_B_isolate V07-146, KF952601_B, KJ192209_A2a, KJ192210_A2a1, KJ192211_A2a1, KJ192212_A2b2a, KJ192213_A2b2a, KJ192214_A2c1b, KJ192215_A2c1b, KJ192216_A1, KJ192217_A1b1a, KJ192218_A1a1a, KJ192219_A1a1a, KJ192220_A2b1a, KJ192221_A2b1a, KJ192222_A2b2b, KJ192223_A2b2b, KJ192224_A2c1a, KJ192225_A2c1a, KJ192226_A1a1, KJ192227_A1a, KJ192228_A2c, KJ192229_A2c, KJ192230_A1b2, KJ192231_A1b2, KJ192232_A2b1, KJ192234_A1b1a,                                                                                            | FJ207525_ <i>Capra falconeri</i> , FJ207526_ <i>Capra ibex</i>                            |

|                                                                        |                                                                                                                                                                                                                                                                                                                                                                                                                                                                                                                                                                                                                                       |                                                                                                               |
|------------------------------------------------------------------------|---------------------------------------------------------------------------------------------------------------------------------------------------------------------------------------------------------------------------------------------------------------------------------------------------------------------------------------------------------------------------------------------------------------------------------------------------------------------------------------------------------------------------------------------------------------------------------------------------------------------------------------|---------------------------------------------------------------------------------------------------------------|
|                                                                        | KJ192235_A1b1, KJ192236_C                                                                                                                                                                                                                                                                                                                                                                                                                                                                                                                                                                                                             |                                                                                                               |
| <b>Cattle</b><br><b>(<i>Bos taurus</i>)</b><br><b>(V00654)</b>         | AY126697_I1, AY676861_T3d1, AY676862_T3r, AY676864_T3g, AY676873_T3o, DQ124375_T4a, DQ124376_T3k1, DQ124377_T4, DQ124391_T3n1, DQ124409_T3c, DQ124416_T3b, DQ124418_T3a1a, EU177824_T3p, EU177826_T3q1, EU177829_T3j, EU177852_T2d, EU177853_T2, EU177857_T2b, EU177860_T2c, EU177865_T5b, EU177868_I1, FJ971084_R1a, FJ971085_R1a, GU947012_T3f1, HQ184030_Q2, HQ184036_Q1, JN817304_T1d1, JN817309_T1c1a1, JN817313_T1a, JN817330_T1d1, JN817335_T1a1, JN817343_T1f, JN817348_T1b, JN817351_T1b1a, JQ437479_primigenius, GU985279_CPC98, JQ967333_T3s, KC153973_T1e, KF163072_T1c, KF163081_T1d, KF525852_C(Ancient Chinese Cattle) | EF494178.1_ <i>Bos grunniens</i> , GU947006.1_ <i>Bison bison</i> , JN632602.1_ <i>Bison bonasus</i>          |
| <b>Brown Bear</b><br><b>(<i>Ursus arctos</i>)</b><br><b>(HQ685964)</b> | AF303110_Eastern, AF303111_Ursus_maritimus, AJ428577.1_Greenland, EU497665.1_Western, GU573486_isolate_12WH, GU573487_isolate_A91-05, GU573488_Ursus_maritimus, GU573489_isolate_14KB, GU573490_Ursus_maritimus_isolate_495, GU573491_isolate_76824, HQ685901_isolate_1, HQ685903.1_isolate_3, HQ685929_isolate_29, HQ685942_isolate_42, HQ685957_isolate_57, HQ685960_isolate_60, JX196367_isolate_KEN10-UAR100, JX196369_isolate_ABC1-051711, AP012559_isolate_834                                                                                                                                                                  | <i>Ursus spelaeus</i> (EU327344), <i>Ursus americanus</i> (NC_003426) and <i>Ursus thibetanus</i> (NC_011118) |
| <b>Roe Deer</b><br><b>(<i>Capreolus capreolus</i>)</b>                 | KJ681480-KJ681491                                                                                                                                                                                                                                                                                                                                                                                                                                                                                                                                                                                                                     | <i>Capreolus pygargus</i> (KJ681491- KJ681495), <i>Alces alces</i> (NC_020677)                                |

|             |  |                                              |
|-------------|--|----------------------------------------------|
| (NC_020684) |  | and <i>Hydropotes inermis</i><br>(NC_011821) |
|-------------|--|----------------------------------------------|

**Supplementary Table 1 | Accession codes for mitochondrial genomes downloaded from NCBI for phylogenetic tree construction.**

| SAMPL<br>E   | TOTAL<br>SHOTGU<br>N READS | SHOTGUN<br>READS<br>AFTER<br>CLIPPING | SHOTGU<br>N<br>TOTAL<br>MAPPED<br>READS | FILTERE<br>D<br>UNIQUE<br>MAPPE<br>D<br>READS | SHOTGU<br>N<br>MT<br>COVERAG<br>E (X) | TOTAL<br>CAPTURE<br>D READS | CAPTURE<br>READS<br>AFTER<br>CLIPPING | CAPTUR<br>E<br>TOTAL<br>MAPPE<br>D<br>READS | FILTERED<br>UNIQUE<br>MAPPED<br>READS | CAPTURE<br>MT<br>COVERAG<br>E (X) | CAPTUR<br>E<br>AVERAG<br>E READ<br>LENGTH |
|--------------|----------------------------|---------------------------------------|-----------------------------------------|-----------------------------------------------|---------------------------------------|-----------------------------|---------------------------------------|---------------------------------------------|---------------------------------------|-----------------------------------|-------------------------------------------|
| <b>10304</b> | 824279                     | 790340                                | 15                                      | 14                                            | 0.04                                  | 1739134                     | 1588194                               | 38293                                       | 7028                                  | 20.6                              | 55.7                                      |
| <b>O314</b>  | 870940                     | 832339                                | 3042                                    | 2763                                          | 7.99                                  | 1993094                     | 1891808                               | 140408<br>7                                 | 29801                                 | 104.6                             | 63                                        |
| <b>OCA</b>   | 4947201                    | 4734128                               | 213                                     | 194                                           | 0.41                                  | 364953                      | 313309                                | 1512                                        | 822                                   | 2.0                               | 53                                        |
| <b>OCD</b>   | 723348                     | 691219                                | 6                                       | 6                                             | 0.02                                  | 2422032                     | 2295615                               | 23580                                       | 5141                                  | 15.5                              | 65                                        |
| <b>OCL2</b>  | 533933                     | 508963                                | 5                                       | 5                                             | 0.01                                  | 594102                      | 562100                                | 6420                                        | 1,197                                 | 3.6                               | 65                                        |
| <b>OLC</b>   | 587776                     | 561880                                | 32                                      | 32                                            | 0.08                                  | 1287892                     | 1225548                               | 134420                                      | 14879                                 | 48.3                              | 59                                        |
| <b>OL</b>    | 962864                     | 913673                                | 103                                     | 102                                           | 0.34                                  | 4900933                     | 4635327                               | 847450                                      | 30782                                 | 110                               | 64                                        |
| <b>OSA</b>   | 1323451<br>6               | 12664087                              | 2333                                    | 2169                                          | 5.92                                  | 72794                       | 66300                                 | 16072                                       | 7398                                  | 22.4                              | 54                                        |
| <b>OH</b>    | NA                         | NA                                    | NA                                      | NA                                            | NA                                    | 21672                       | 6960                                  | 1627                                        | 151                                   | 0.4                               | 57                                        |

Supplementary table 2 | Sequencing output for shotgun and capture libraries.

| Sample       | Species | Haplogroups | Polymorphisms                                                                                                                                                                                                                                                                                                                                                                                                                                                                                                                                                                                      |
|--------------|---------|-------------|----------------------------------------------------------------------------------------------------------------------------------------------------------------------------------------------------------------------------------------------------------------------------------------------------------------------------------------------------------------------------------------------------------------------------------------------------------------------------------------------------------------------------------------------------------------------------------------------------|
| <b>OSA</b>   | Cattle  | T3          | <b>169G,215+T,587+C,2536A,9682C,13310C,</b><br>1599deletion                                                                                                                                                                                                                                                                                                                                                                                                                                                                                                                                        |
| <b>O314</b>  | Goat    | A           | <b>203C,1849T,2207C,2849C,3194G,</b><br><b>3468C,4032C,5601T,6096C, 7052A,7342A,</b><br><b>7660C,7839C,7885T,8055G,</b><br><b>8078T,8480C,8635C,8703T,8730C,8818C,8959T,9010T,</b><br><b>9826T,10479G,10638T,10686C,10813C,</b><br><b>11364C,11691G,11702A,11872G,</b><br><b>12383T,13100T,13178C,13280G,13286C,13681A,</b><br><b>13741C,13756T,13964A,14461T,14746C,14795A,</b><br><b>15004C,15220T,</b><br>1119deletion,<br>7027T,15543C,15631A,15637T,15728G,15747A,15807T,<br>15811C,15843G,15893C,15913G,16045C,16083T,16232<br>C,16435A,16440C                                               |
| <b>OL</b>    | Goat    | A           | <b>203C,1849T,2207C,2849C,3194G,</b><br><b>3468C,4032C,5601T,6096C,7052A,7342A,7660C,7839C,</b><br><b>7885T, 8055G,8078T,8480C,</b><br><b>8635C,8703T,8730C,8818C,8959T, 9010T,</b><br><b>9826T,10479G,10638T,10686C,10813C, 11364C,</b><br><b>11691G,11702A,11872G,12383T,</b><br><b>13100T,13178C,13280G,</b><br><b>13286C,13681A,13741C,13756T,</b><br><b>13964A,14461T,14746C,14795A,15004C,15220T,</b><br>1119deletion, 3222A,11558T, 12140A,<br>15462T,15543C,15631A,15637T,15728G,15747A,15807<br>T,15811C,15843G,15893C,15913G,16045C,16083T,162<br>32C,16458T,16485C,16504deletion,16515G |
| <b>10304</b> | Sheep   | B1          | <b>281C,566+G,1729+C,3543A,6615A,7500A,8264C,8651T</b><br><b>,9375G,11668A,11710deletion,12539C,12571C,13199G,</b><br><b>13813C,14055C,15783T,15820T,16128T,16342+C,1634</b><br><b>3C,16472deletion,</b><br>3092T,3230C,7983C,12494T,13375G,15579A,15923G,1<br>6147C,16440C,16466C                                                                                                                                                                                                                                                                                                                 |
| <b>OCD</b>   | Sheep   | B1          | <b>281C,566+G,1729+C,3543A,6615A,7500A,8264C,8651T</b><br><b>,9375G,11710deletion,11273T,11473G,11668A,12539C,</b><br><b>12571C,13199G,13813C,14055C,14653A,15721C,15783</b><br><b>T,15800T,15820T,16128T,16342+C,16343C,163472dele</b><br><b>tion, 6965T,6975T,14871C,15923G,16036A,16392C</b>                                                                                                                                                                                                                                                                                                    |
| <b>OCL2*</b> | Sheep   | B1          | <b>281C,566+G,3543A,6615A,7500A,8264C, 8651T,</b><br><b>9375G,11668A,11710deletion,12539C,12571C,13199G,</b><br><b>14055C,15783T,16128T,16342+C,16343C,163472deleti</b><br><b>on,</b><br>1849A,2141A,2144G,2148T,2443T,2666T,5350C,7983C,<br>8927G,10615T,13549T,14530G,16392C                                                                                                                                                                                                                                                                                                                     |
| <b>OLC</b>   | Sheep   | B1          | <b>281C,566+G,1729+C,3543A,6615A,7500A,8264C,8651T</b><br><b>,9375G,11668A,11710deletion,12539C,12571C,13199G,</b><br><b>13813C,14055C,15800T,15820T,16128T,16342+C,1634</b><br><b>3C, 16472deletion,</b><br>2801C,11273T,11473G,14653A,14871C,15923G,16036A<br>,16392C                                                                                                                                                                                                                                                                                                                            |

**Supplementary table 3 | Identified haplogroups for captured libraries made from consensus mapped reads.** Polymorphisms listed in bold are expected haplotypes for each haplogroup, polymorphisms in regular font are mutations not yet associated with identified haplogroups. All polymorphisms are relative to the mapped reference mitogenome, NCBI accession codes are in Supplementary table 4. \*OCL2 is a partial reconstruction with low average coverage, missing sites include: 1-8np, 405-418np, 1678-1800np, 2216-2316np, 2855-

2930np, 3471-3514np, 5527-5556np, 5604-5639np, 6393-6415np, 6760-6784np, 7515-7541np,  
7611-7644np, 8735-8794np, 9029-9067np, 11604-11634np, 12420-12466np, 12723-12767np,  
13288-13362np, 16247-16289np.

| <b>Species</b>                               | <b>Accession code</b> |
|----------------------------------------------|-----------------------|
| <b>Brown bear (<i>Ursus arctos</i>)</b>      | HQ685964              |
| <b>Chamois (<i>Rupicapra rupicapra</i>)</b>  | NC_020633             |
| <b>Cattle (<i>Bos taurus</i>)</b>            | V00654                |
| <b>Roe deer (<i>Capreolus capreolus</i>)</b> | NC_020684             |
| <b>Goat (<i>Capra aegagrus hircus</i>)</b>   | NC_005044.2           |
| <b>Human (<i>Homo sapien</i>)</b>            | NC_012920             |
| <b>Ibex (<i>Capra ibex</i>)</b>              | NC_020623             |
| <b>Pig (<i>Sus scrofa</i>)</b>               | NC_012095             |
| <b>Sheep (<i>Ovis aries</i>)</b>             | AF010406              |

**Supplementary table 4 | Reference mitogenomes used for species assignment.** Used default parameters of Fastq\_screen ([http://www.bioinformatics.babraham.ac.uk/projects/fastq\\_screen/](http://www.bioinformatics.babraham.ac.uk/projects/fastq_screen/)) to find which references raw sequenced reads preferentially align.



### A: High coverage data

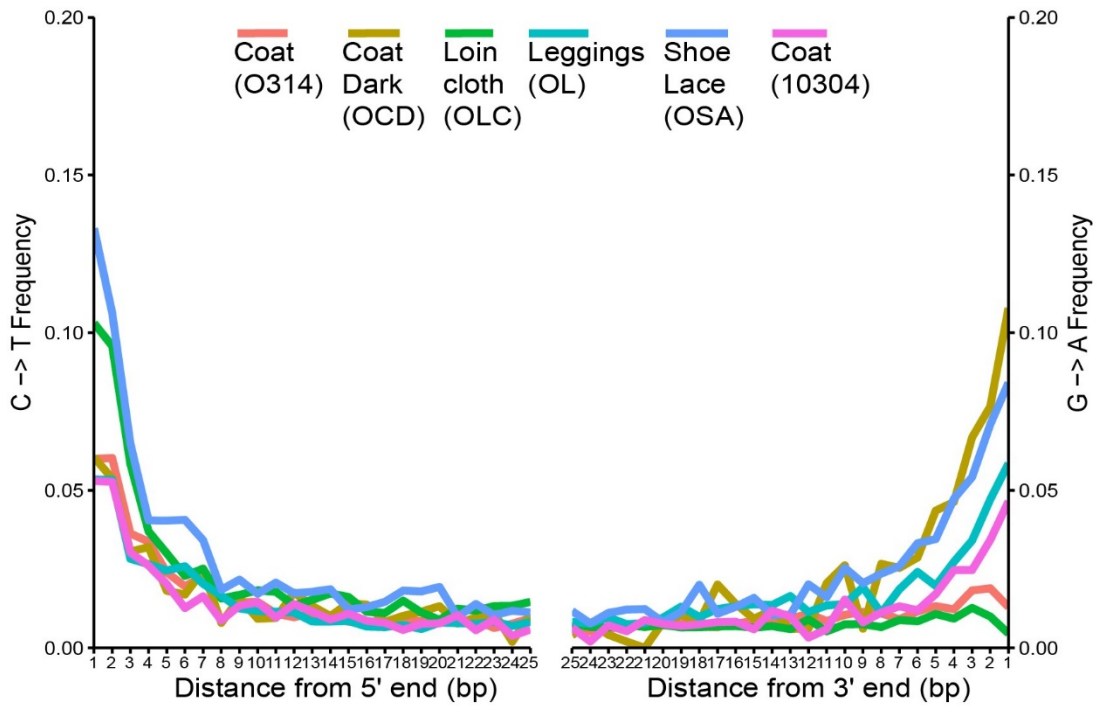

### B: Low coverage data

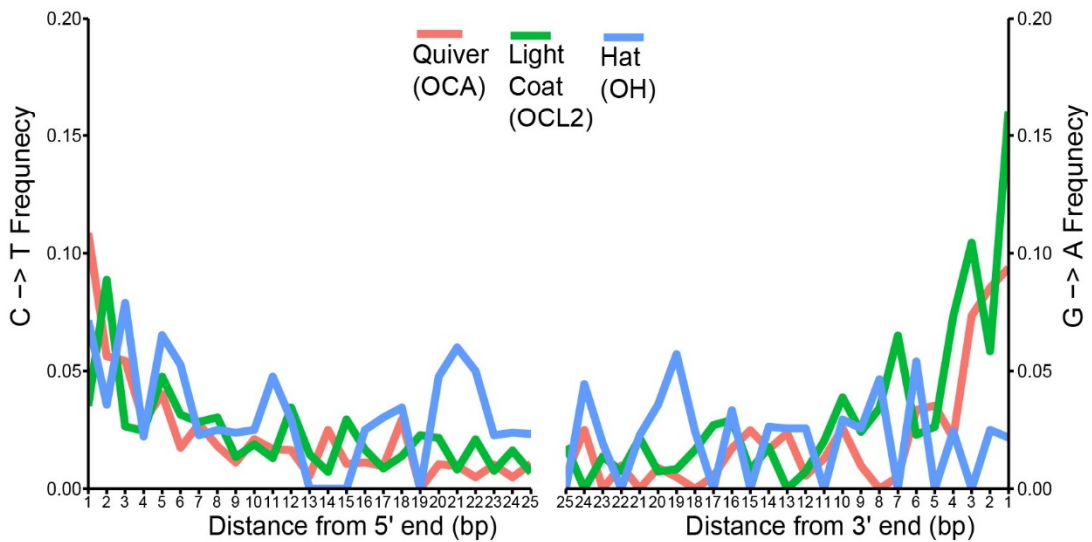

**Supplementary Figure 1 | mapDamage deamination plot. (a)** Six high coverage enriched mitogenome libraries. **(b)** Three low coverage enriched mitogenome libraries.

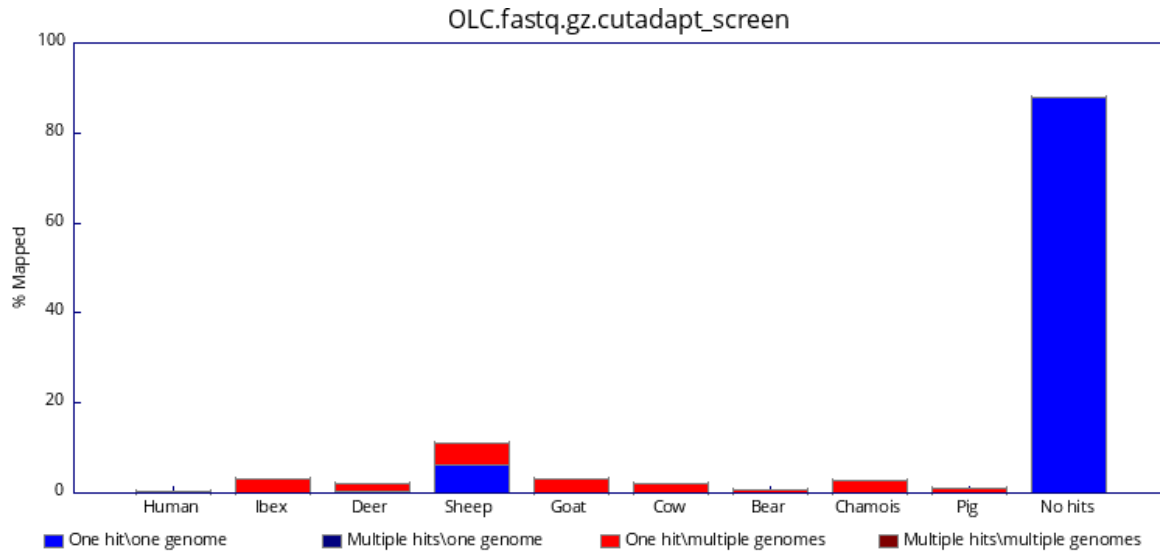

**Supplementary Figure 2 | Fastq\_screen.** Initial species assignment for Loincloth from enriched library.

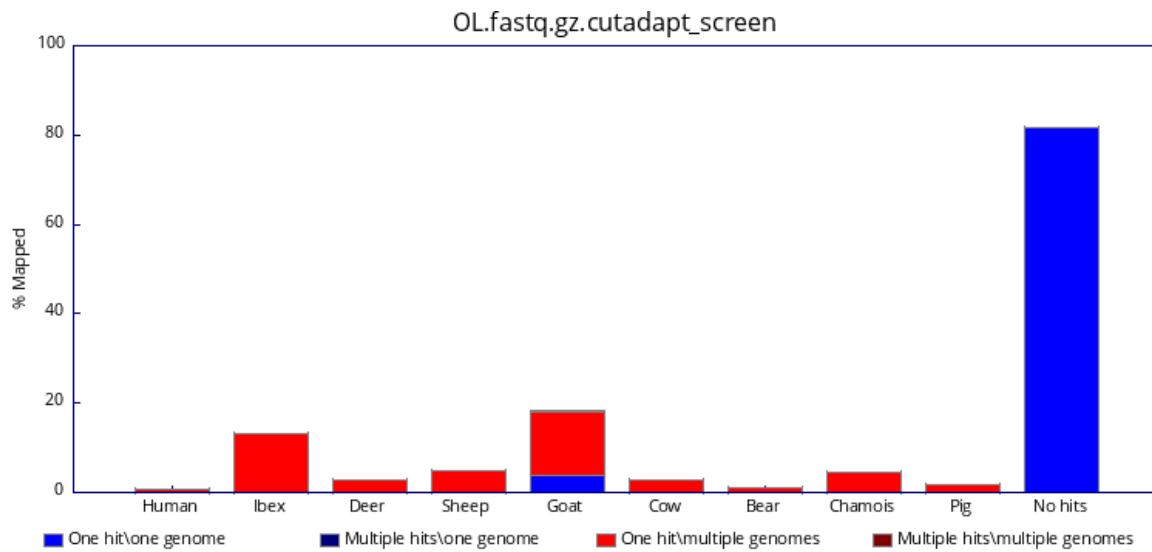

**Supplementary Figure 3 | Fastq\_screen.** Initial species assignment for leggings from the enriched library.

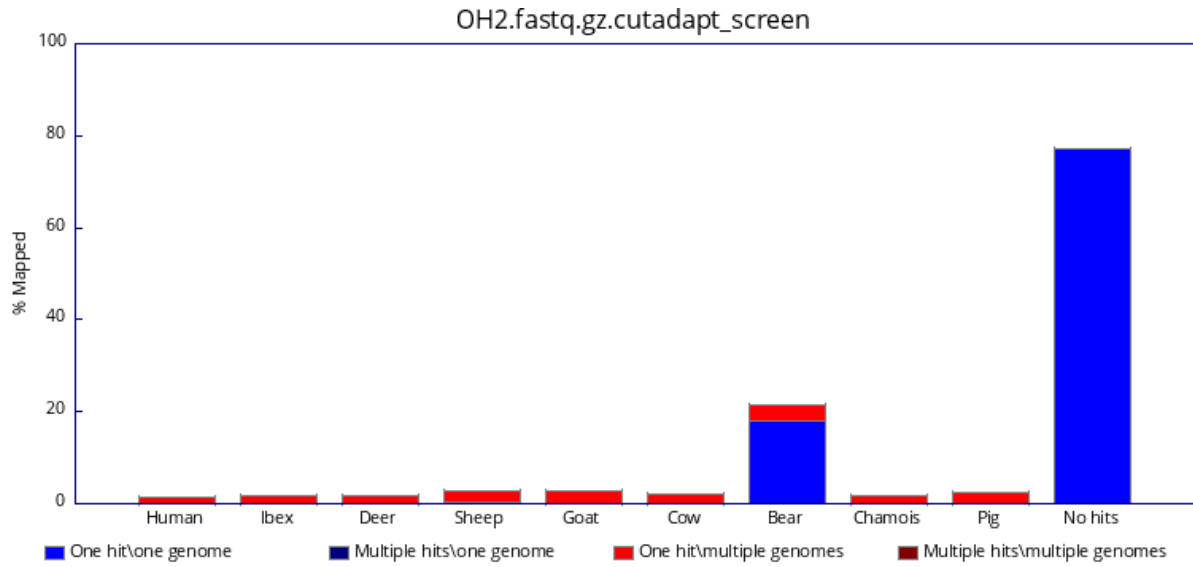

**Supplementary Figure 4 | Fastq\_screen.** Initial species assignment for the hat from enriched library.

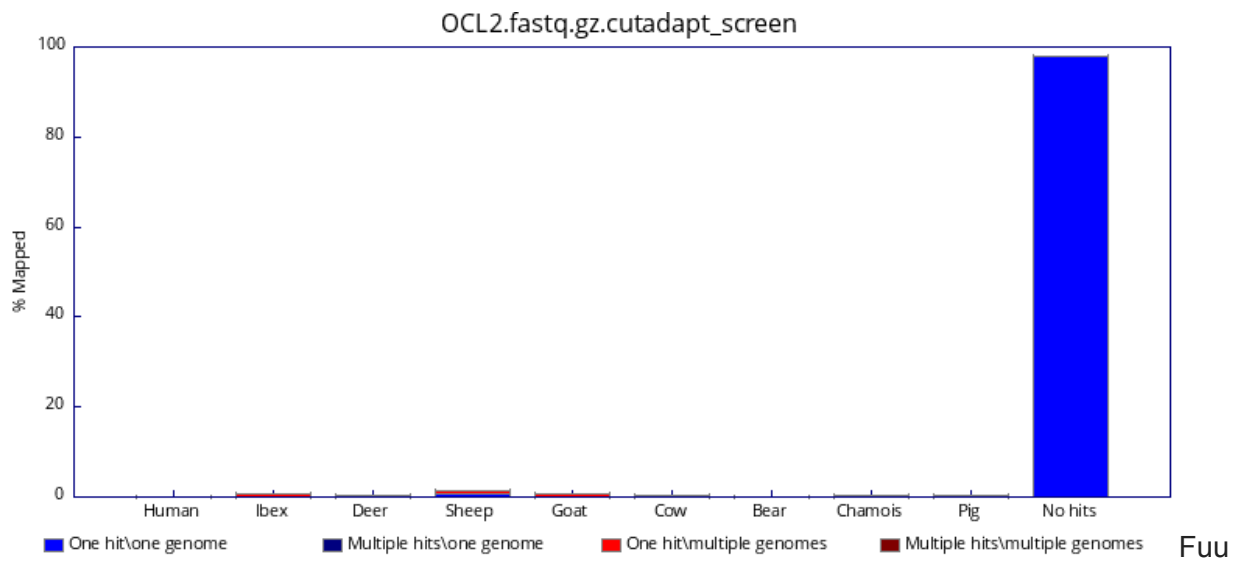

**Supplementary Figure 5 | Fastq\_screen.** Initial species assignment for the light coat from enriched library.

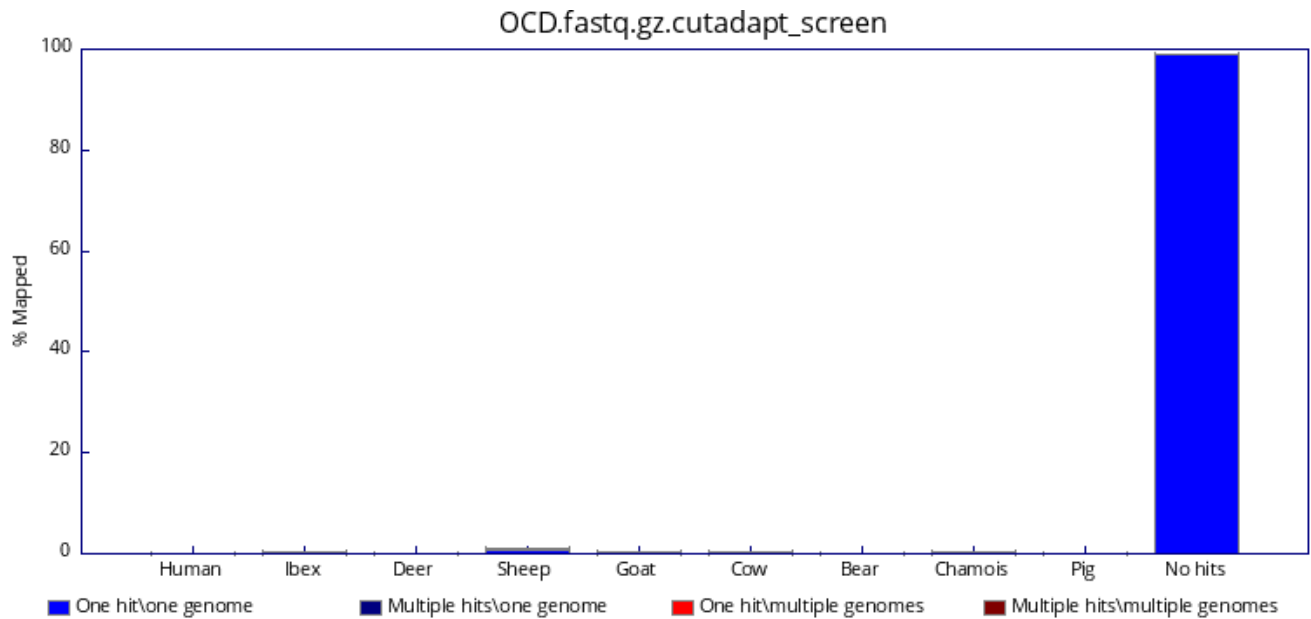

**Supplementary Figure 6 | Fastq\_screen.** Initial species assignment for the dark coat from the enriched library.

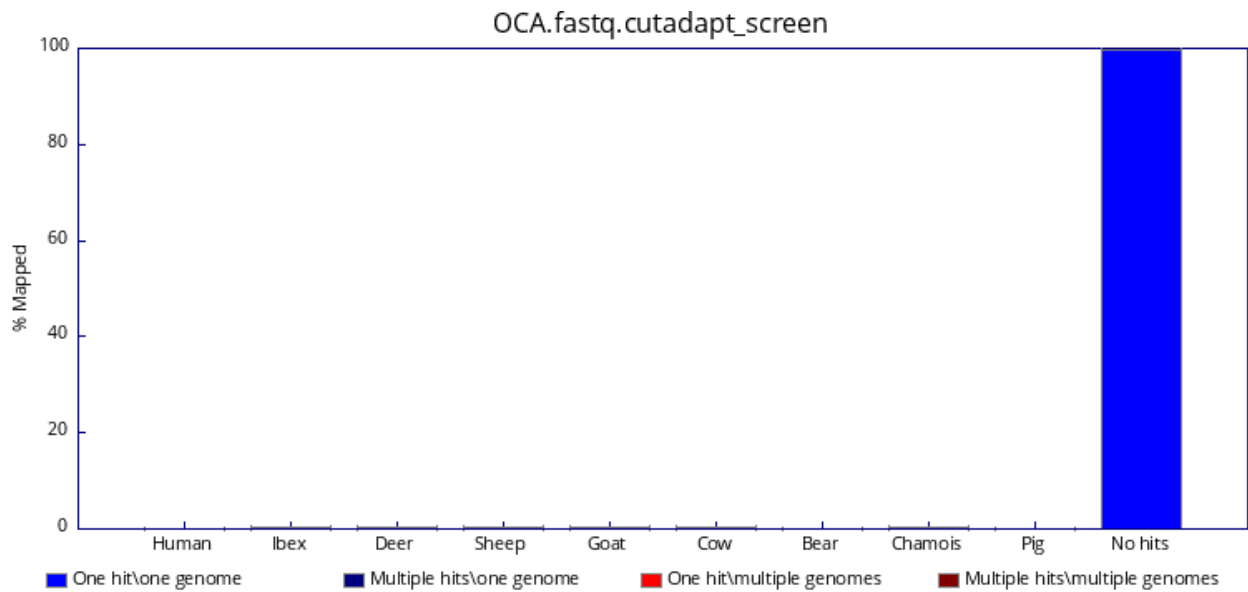

**Supplementary Figure 7 | Fastq\_screen.** Initial species assignment for the quiver from enriched library.

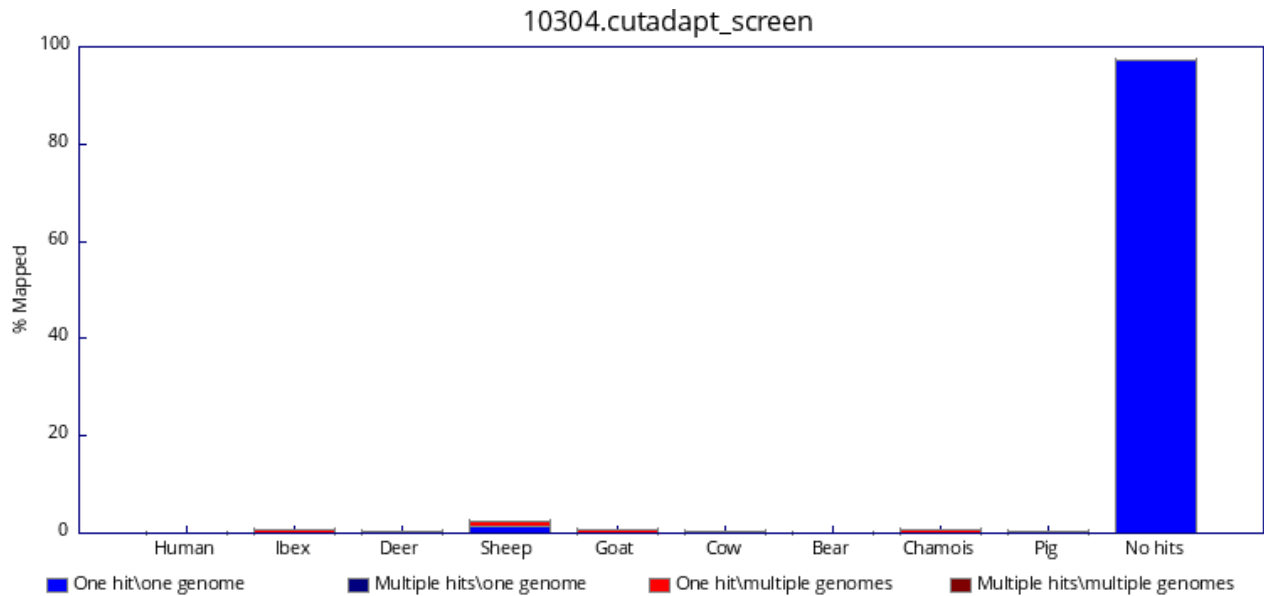

**Supplementary Figure 8 | Fastq\_screen.** Initial species assignment for coat sample 10304 from the enriched library.

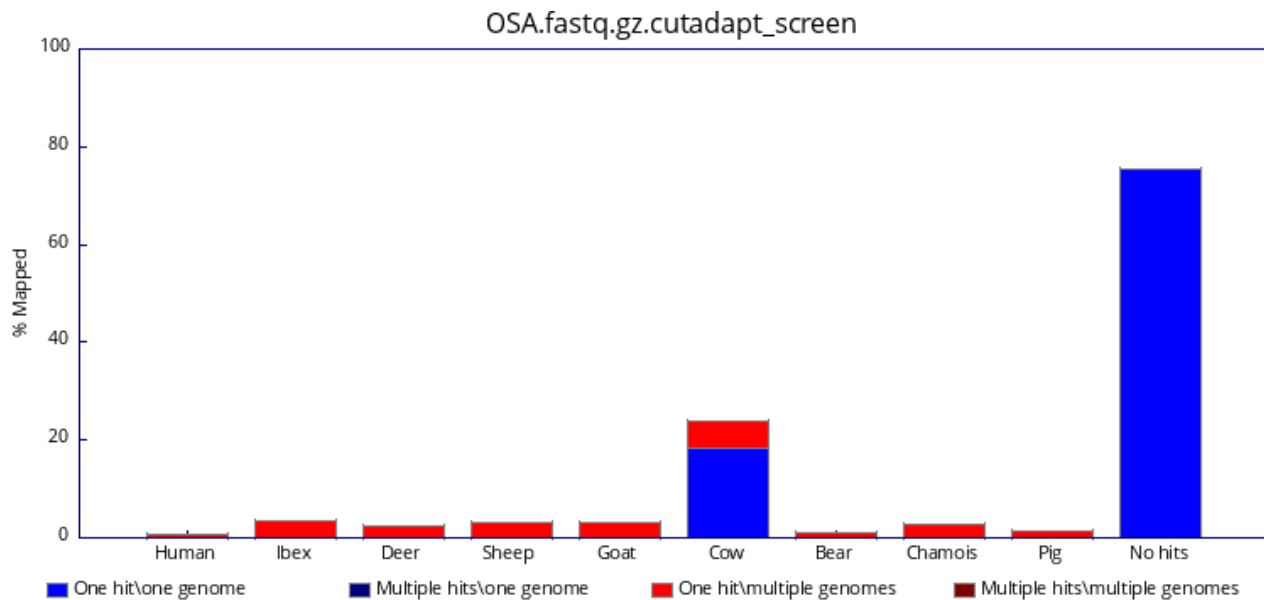

**Supplementary Figure 9 | Fastq\_screen.** Initial species assignment for the shoelace sample from the enriched library.

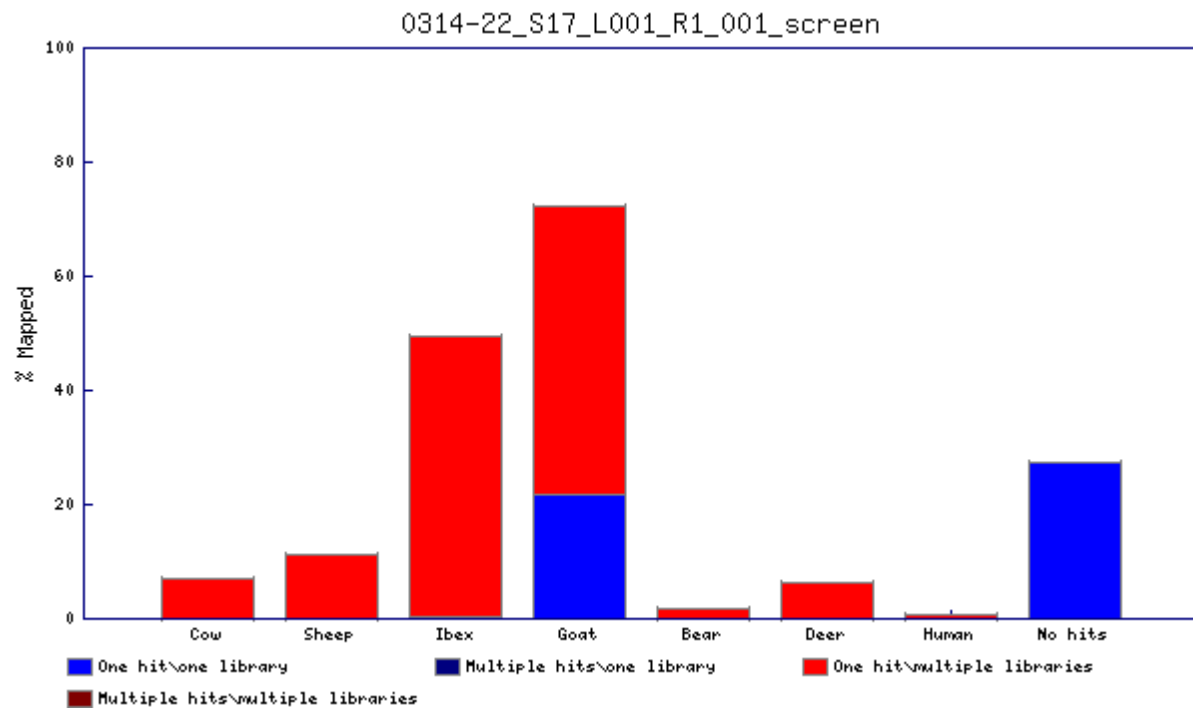

**Supplementary Figure 10 | Fastq\_screen.** Initial species assignment for the coat sample 0314 from the enriched library.

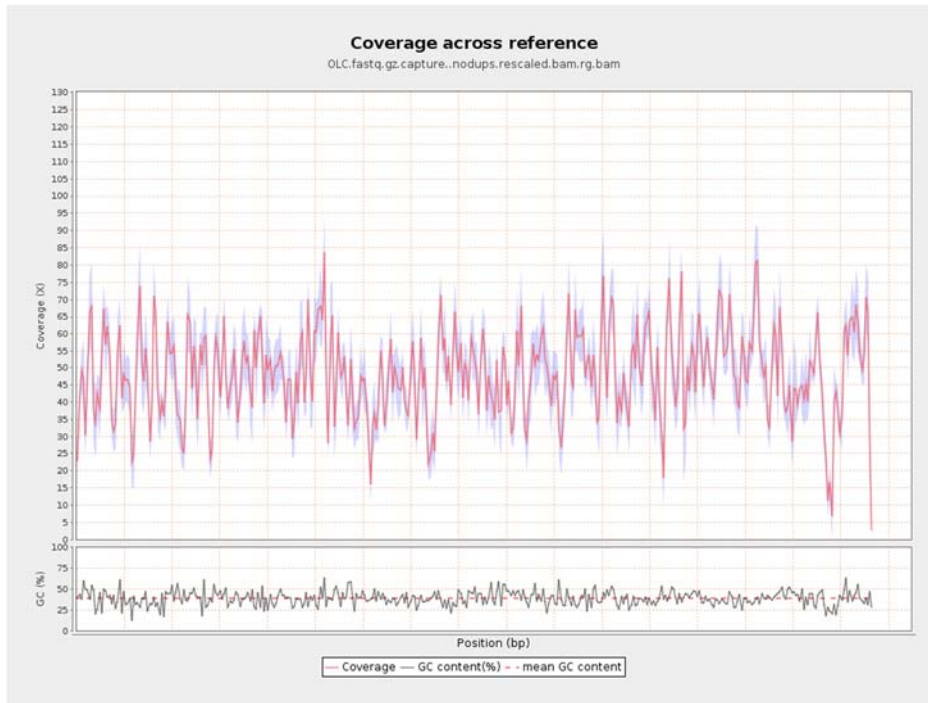

**Supplementary Figure 11 | Coverage across the reference.** Captured loincloth library (OLC).

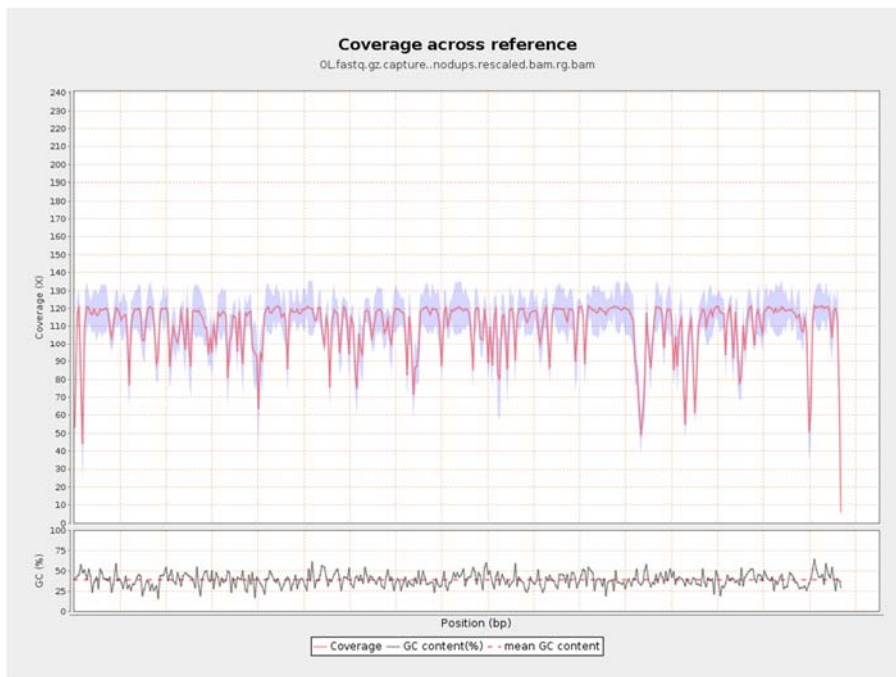

**Supplementary Figure 12 | Coverage across the reference.** Captured leggings library (OL).

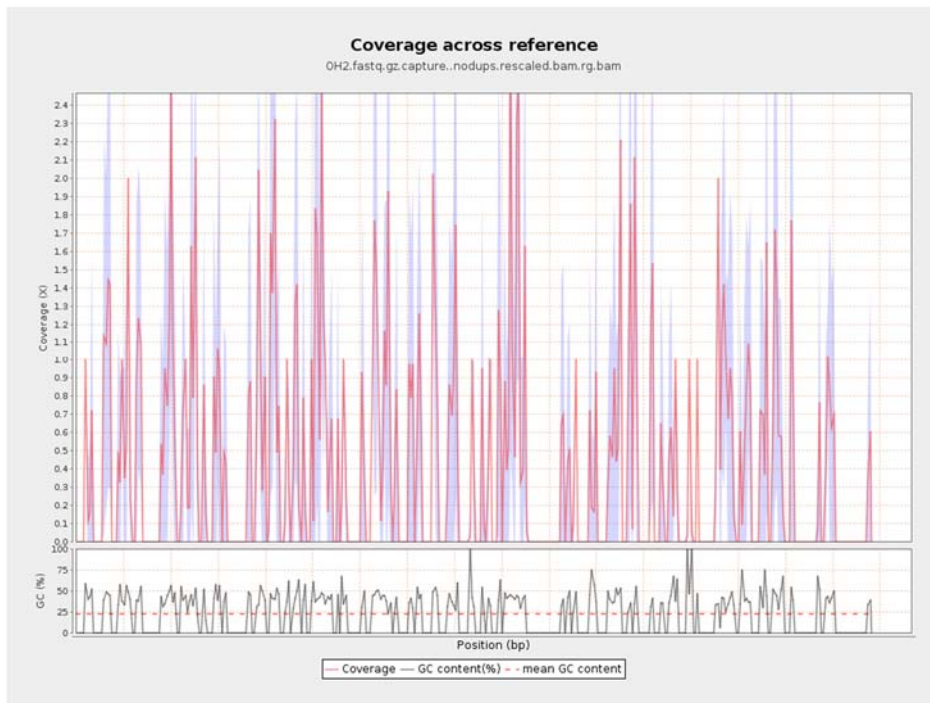

**Supplementary Figure 13 | Coverage across the reference.** Captured hat library (OH).

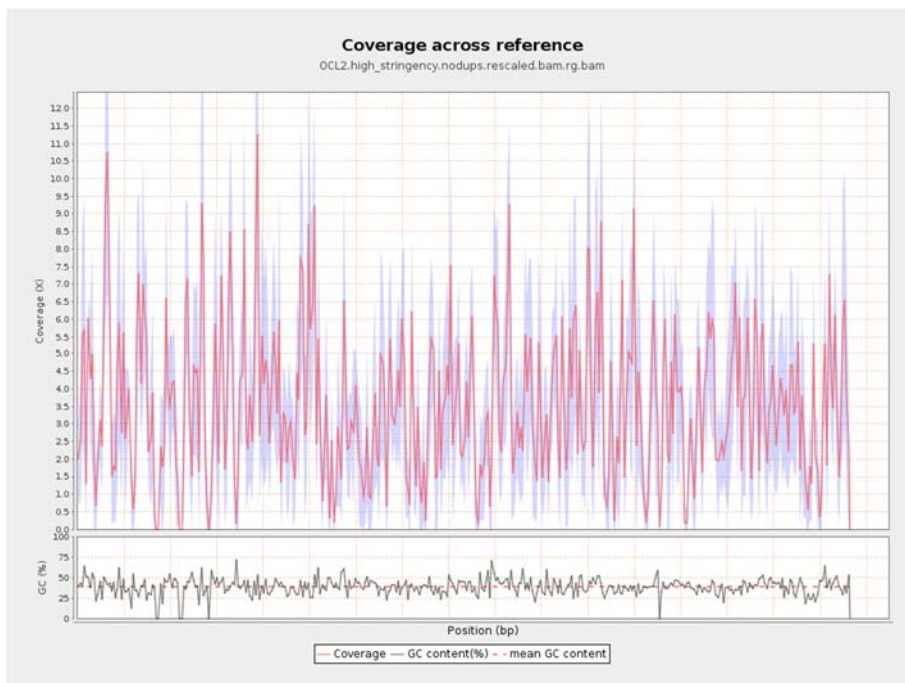

**Supplementary Figure 14 | Coverage across the reference.** Captured light coat library (OCL2).



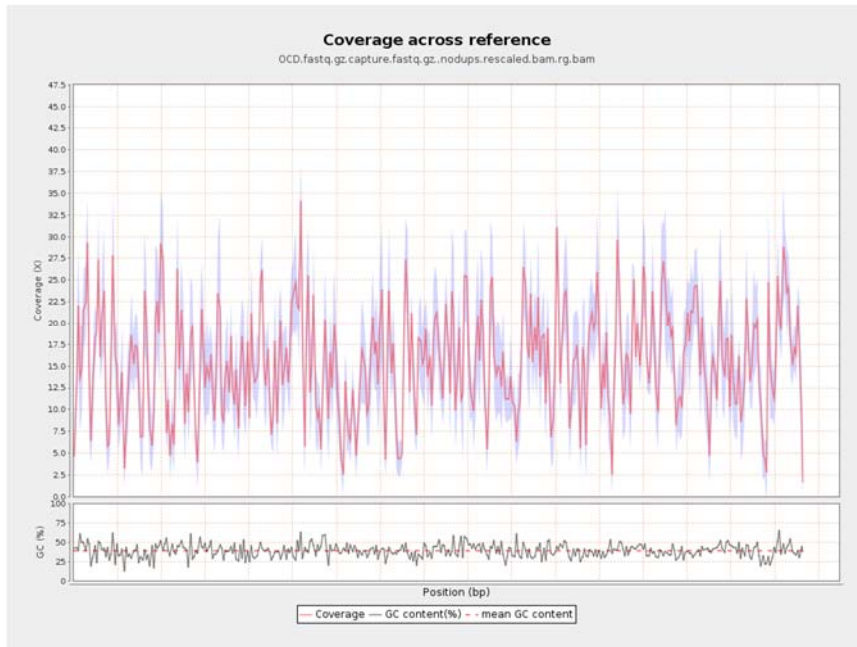

**Supplementary Figure 15 | Coverage across the reference.** Captured dark coat library (OCD).

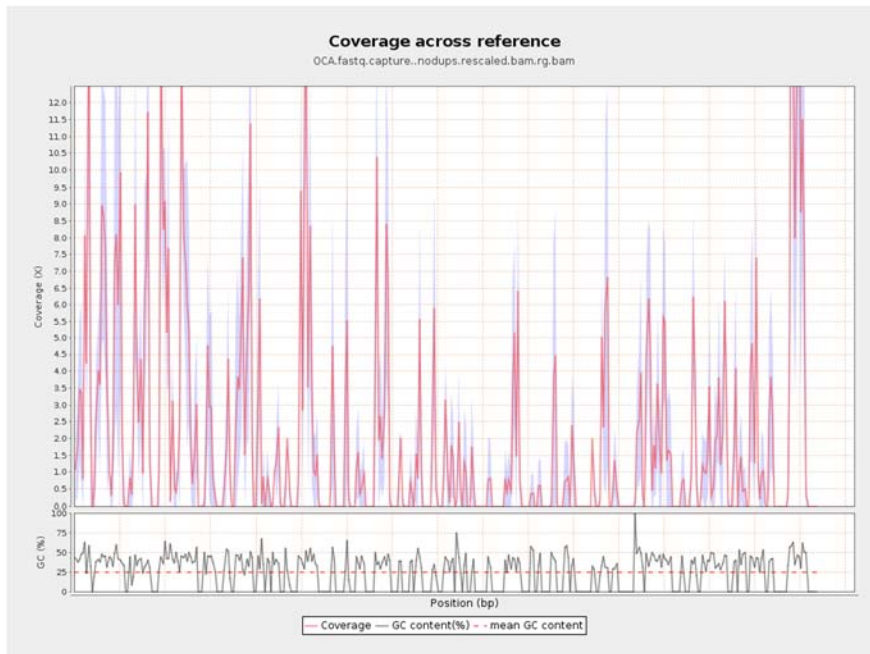

**Supplementary Figure 16 | Coverage across the reference.** Captured quiver library (OCA).

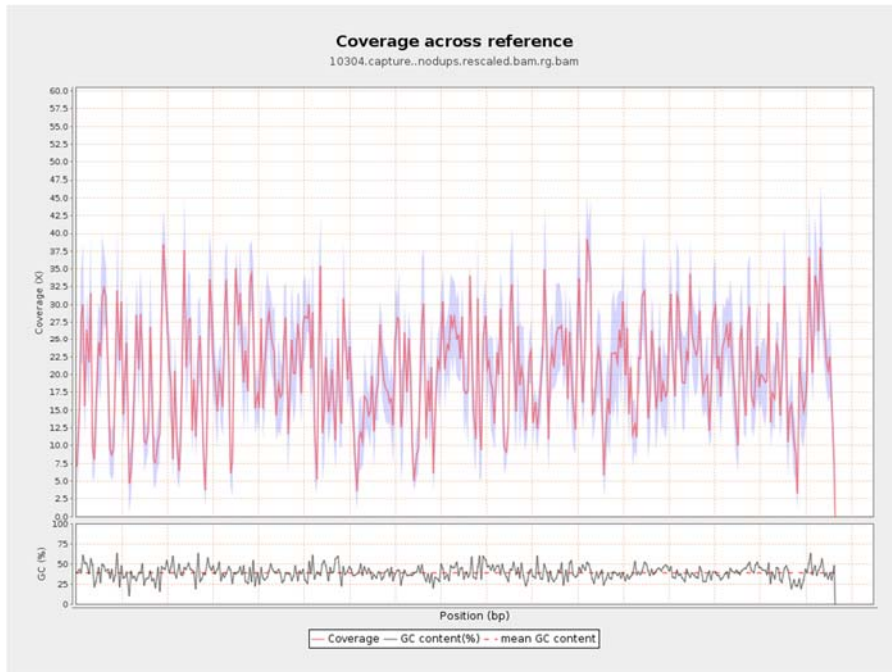

**Supplementary Figure 17 | Coverage across the reference.** Captured coat library (10304).

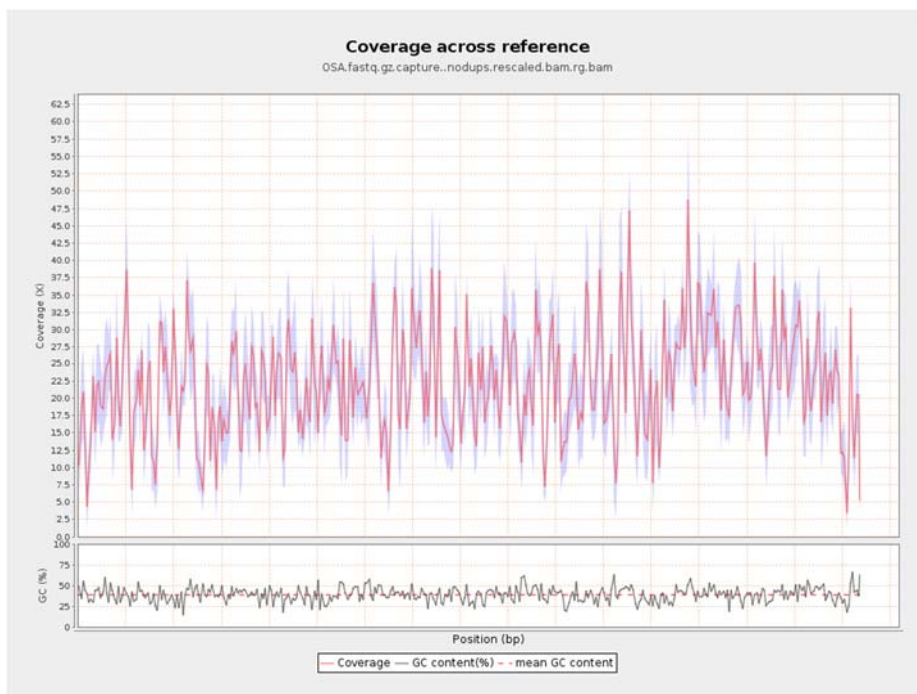

**Supplementary Figure 18 | Coverage across the reference.** Captured shoe library (OSA).

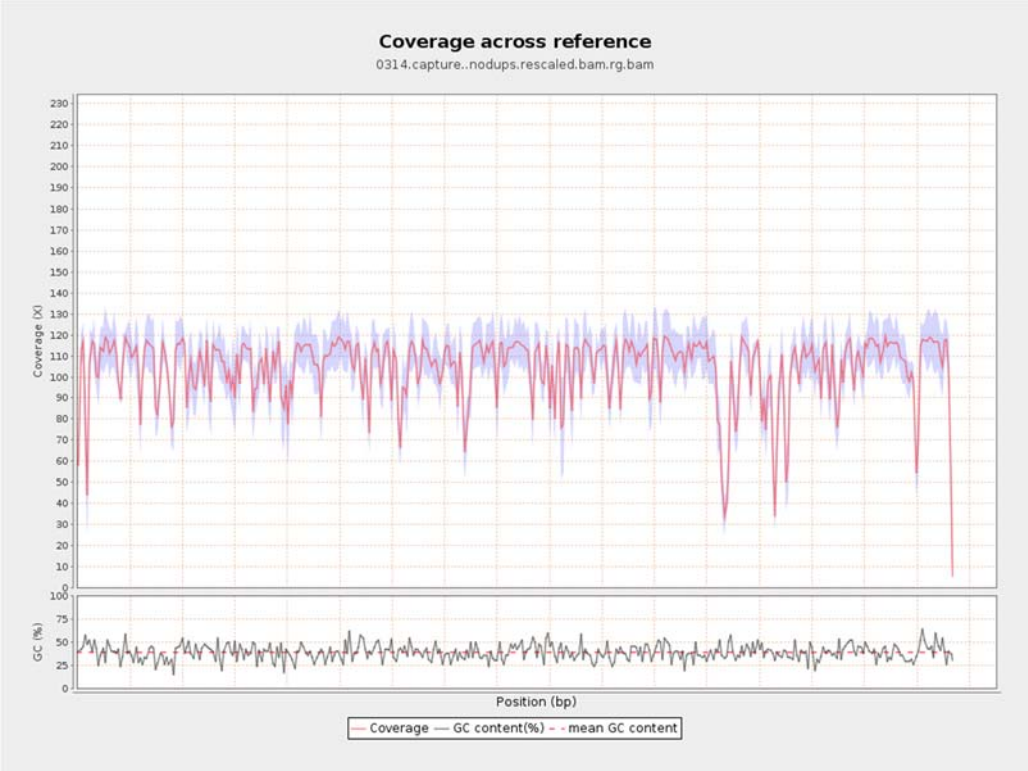

**Supplementary Figure 19 | Coverage across the reference.** Captured coat library (O314).
